# Supplementary material
Source: HighWire-hosted journal article supplement (https://www.cmajopen.ca/content/suppl/2020/05/15/8.2.E383)

1  
2  
3 Title: Reversing Deficiencies in Thiamine Prescribing Using the Computerized Order Entry  
4  
5 System  
6  
7  
8  
9

10 Running Title: Reversing Deficiencies in Thiamine Prescribing  
11  
12  
13

14 Gregory S Day MD MSc FRCPC<sup>1,2</sup>, Safiya Ladak BScPhm<sup>3,4</sup>, C Martin del Campo MD  
15  
16 FRCPC<sup>4,5</sup>  
17  
18  
19  
20

21 Institutional Affiliations:  
22  
23

24 <sup>1</sup> Knight Alzheimer Disease Research Center, Washington University School of Medicine, Saint  
25  
26 Louis, Missouri, USA  
27

28 <sup>2</sup> Department of Neurology, Washington University School of Medicine, St. Louis, Missouri,  
29  
30 USA  
31

32  
33 <sup>3</sup> Krembil Neurosciences Program, Toronto Western Hospital, University Health Network,  
34  
35 Toronto, Ontario, Canada  
36

37 <sup>4</sup> Department of Pharmacy, University Health Network, Toronto, Ontario, Canada  
38

39  
40 <sup>5</sup> Department of Medicine, Division of Neurology, University of Toronto, Toronto, Ontario,  
41  
42 Canada  
43  
44  
45

46  
47 Corresponding Author:  
48

49 Dr. Gregory S Day  
50

51 Department of Neurology, Washington University School of Medicine  
52

53 Knight Alzheimer Disease Research Center  
54  
55  
56  
57

*CMAJ*

Day *et al*, 2019

4488 Forest Park Avenue, Suite 101

Saint Louis, Missouri; 63108

Telephone: 314.286.2407

Email: gday@wustl.edu

Word count, abstract: 259

Word count, text: 2332

Tables: 2

Figures: 3

References: 32

Key Words: thiamine deficiency, Wernicke encephalopathy, computerized order entry, electronic medical records

Study funding: None to declare

Confidential

## Author Contributions:

GS Day developed the study concept and methods for implementation, and was primarily responsible for analysis and interpretation of data, as well as drafting, revision and finalization of the manuscript. GS Day had full access to all study data, and takes responsibility for the integrity of the data, and the accuracy of the analyses and interpretation.

S Ladak developed the study concept and methods for implementation, and was primarily responsible for data acquisition. She participated in drafting, revision and finalization of the manuscript.

CM del Campo approved study design and methods. He assisted with interpretation of data, and revision and finalization of the manuscript.

## Author disclosures:

GS Day receives research/grant support from Avid Radiopharmaceuticals, the Foundation for Barnes Jewish Hospital, and the National Institutes of Health (K23AG064029, P01AG03991, R56AG057195). He holds stock in ANI Pharmaceuticals, Inc. Dr Day has provided record review and expert medical testimony on legal cases pertaining to management of Wernicke encephalopathy.

S Ladak reports no disclosures.

CM del Campo reports no disclosures.

1  
2  
3 Acknowledgements: Preliminary data were reported in abstract form at the 2016 annual meeting  
4 of the American Academy of Neurology (April 2016; Vancouver, BC). The authors are grateful  
5 for the contributions of Ms. Donna Lowe within the Department of Pharmacy, and members  
6 from the University Health Network information technology team, including Richard Baker, who  
7 facilitated data collection. No sources of funding are reported for this study.  
8  
9  
10  
11  
12  
13  
14  
15  
16  
17  
18  
19  
20  
21  
22  
23  
24  
25  
26  
27  
28  
29  
30  
31  
32  
33  
34  
35  
36  
37  
38  
39  
40  
41  
42  
43  
44  
45  
46  
47  
48  
49  
50  
51  
52  
53  
54  
55  
56  
57  
58  
59  
60

Confidential

**ABSTRACT**

Background: Optimal treatment of thiamine deficiency requires rapid reversal of the brain-thiamine deficit. This is best accomplished through administration of parenteral thiamine.

Despite this knowledge, oral thiamine is frequently prescribed to at-risk patients admitted to Canadian academic hospitals. We evaluated the effect of changes to the computerized order entry system promoting the use of high doses of parenteral thiamine on prescribing behavior within our academic hospital network.

Methods: Data were obtained from the computerized pharmacy information system, recording thiamine prescribed at University Health Network hospitals (Toronto, Ontario) before (January 1, 2010 to December 31, 2011) and after (November 21, 2013 to April 30, 2017) implementation of changes to the computerized order entry system promoting prescribing of high-dose parenteral thiamine. The effect of the intervention on the proportion of prescriptions for parenteral thiamine (primary outcome) and dosages prescribed (secondary outcome) were determined.

Results: The proportion of prescriptions for parenteral thiamine rose from 55.5% (3386/6105) to 92.5% (11,829/12,787) following our intervention ( $\chi^2=3617.7$ ;  $p<0.001$ ). Improvements in parenteral prescribing were sustained or increased across the 3.4 year observation period, and were realized across all hospital services (average improvement:  $179 \pm 59.6\%$ , range: 128.0-298.2%). Prescriptions for higher dosages of thiamine ( $\geq 200$  mg) increased from 1.1% (65/6105) to 61.4% (7845/12,787;  $\chi^2=6170.5$ ;  $p<0.0001$  following the intervention.

Interpretation: Changes to the computerized order entry system corresponded with abrupt increases in the proportion of prescriptions for high-dose parenteral thiamine at our academic

1  
2  
3 hospital. Similar approaches may be used to align prescriber behavior with well-accepted  
4  
5 practice parameters or guidelines in other areas of clinical practice, and other hospital systems.  
6  
7  
8  
9  
10  
11  
12  
13  
14  
15  
16  
17  
18  
19  
20  
21  
22  
23  
24  
25  
26  
27  
28  
29  
30  
31  
32  
33  
34  
35  
36  
37  
38  
39  
40  
41  
42  
43  
44  
45  
46  
47  
48  
49  
50  
51  
52  
53  
54  
55  
56  
57  
58  
59  
60

Confidential

## INTRODUCTION

Hospitalized patients are at high risk of thiamine deficiency due to a preponderance of risk factors, including poor nutritional intake, increased metabolic demand, resuscitation with glucose-containing fluids and medical conditions that impair thiamine absorption from dietary sources.<sup>1-5</sup> Adequate treatment of thiamine deficiency requires rapid reversal of the brain-thiamine deficit—a feat best accomplished through administration of high doses of parenteral thiamine.<sup>6,7</sup> Despite recommendations endorsing this approach,<sup>7,8,9</sup> observational studies consistently report low rates of parenteral prescribing within academic hospitals.<sup>1,10</sup> When parenteral thiamine is prescribed, the dosages and duration prescribed are often below that recommended,<sup>1,11</sup> exposing vulnerable patients to potential risks of irreversible brain injury and even death. Prior attempts to alter prescribing practices utilizing cost and effort-intensive strategies (i.e., direct pharmacist intervention) have failed to substantially alter prescriber behavior.<sup>12</sup> Similarly, low-cost efforts (e.g., published guidelines or hospital-wide protocols promoting parenteral prescribing) exhibit only modest effects on prescribing.<sup>1,10,13-15</sup> Efficacious means of reversing deficiencies in prescribing are needed.

A review of parenteral thiamine prescribing at university-affiliated Canadian tertiary-care centers established low rates of parenteral prescribing across the majority of hospital services at the majority of hospitals, including our own.<sup>1</sup> In response to these findings, prescribing practices were reviewed at University Health Network hospitals (university-affiliated hospitals in downtown Toronto, Ontario, Canada). This review led to a system-wide change to thiamine order sets within the computerized order entry system (integrated within the electronic medical record), favoring parenteral prescribing. We evaluated the effect of these changes on the overall

1  
2  
3 rates of parenteral thiamine prescribing (primary outcome) and dosages of thiamine prescribed  
4  
5 (secondary outcome) at our exemplar tertiary care center.  
6  
7  
8  
9  
10  
11  
12  
13  
14  
15  
16  
17  
18  
19  
20  
21  
22  
23  
24  
25  
26  
27  
28  
29  
30  
31  
32  
33  
34  
35  
36  
37  
38  
39  
40  
41  
42  
43  
44  
45  
46  
47  
48  
49  
50  
51  
52  
53  
54  
55  
56  
57  
58  
59  
60

Confidential



## METHODS

### Study design and recruitment

Thiamine prescribing practices at University Health Network hospitals (Toronto General Hospital, Toronto Western Hospital; Toronto, Ontario, Canada) were evaluated through a retrospective observational study collecting data from computerized pharmacy information systems from January 2010 to December 2011 (results previously reported: Hospital 6A).<sup>1</sup> On the basis of these findings, changes to thiamine order sets, promoting parenteral prescribing, were proposed and approved by the University Health Network Pharmacy and Therapeutics Committee (June 3, 2013), and implemented within the computerized order entry system on November 21, 2013. A medical bulletin describing the proposed changes and rationale was communicated to all hospital staff (November 28, 2013). Thiamine prescribing patterns were prospectively tracked to determine the intervention effect (Figure 1). Study objectives, methods and procedures were approved by the University Health Network Research Ethics Board.

Data were obtained from the computerized pharmacy information system, recording all thiamine prescriptions processed by the centralized hospital pharmacy before (January 1, 2010 to December 31, 2011) and after the intervention (November 21, 2013 to April 30, 2017). Thiamine prescribed as part of total parenteral nutrition was excluded from analysis, as prescribing was automated and was, therefore, unlikely to be affected by the intervention. Participant data were fully anonymized. Briefly, patients were assigned a random study number linked to prescription information, and specifying the prescribed dose of thiamine, route of administration (oral: per os, nasogastric tube, orogastric tube, gastric tube; versus parenteral: intravenous, intramuscular), frequency of dosing (daily, twice daily, three times daily, etc), start/end date of the prescription, prescribing physician and inpatient location. Subspecialty designations were assigned according

1  
2  
3 to the prescriber, and were simplified to emergency department (ED), intensive care unit (ICU:  
4 including medical, surgical and trauma ICUs), medical subspecialty (i.e., cardiology,  
5 endocrinology, gastroenterology, medical oncology, rheumatology, etc.), general internal  
6 medicine, neurology, psychiatry and surgical services (i.e., general surgery, cardiac surgery,  
7 neurosurgery, orthopedics, gynecology, etc.).

8  
9  
10 The total number of prescriptions, number of *first* prescriptions (a proxy measure  
11 defining the number of unique patients treated), and number of doses of thiamine prescribed  
12 were measured before and after changes to the computerized order entry system were  
13 implemented. Prescriptions were stratified by the route of administration (parenteral versus oral),  
14 and annualized prescribing rates derived by dividing by the number of years of observation to  
15 facilitate comparison across pre- and post-intervention periods.

### 16 17 18 19 20 21 22 23 24 25 26 27 28 29 30 31 **Statistical Analysis**

32  
33 Changes in parenteral prescribing pre- and post-intervention were compared using chi-square  
34 tests (pairwise comparison,  $df=1$ ). Univariate regression was used to evaluate the relationship  
35 between the rate of parenteral prescribing (dependent variable) and time following the  
36 intervention. Pairwise comparisons (chi-square tests) were also used to assess differences in  
37 parenteral prescribing across services, and pre- and post differences in prescribing behaviors  
38 within services. Statistical analyses were performed using IBM SPSS Statistics 24 (IBM  
39 Corporation, NY). Significance was defined as  $p<0.05$ , with adjustment for multiple  
40 comparisons where appropriate (Bonferroni correction).

### 41 42 43 44 45 46 47 48 49 50 51 52 53 54 **Data Sharing**

1  
2  
3 Anonymized data will be made available to qualified researchers upon reasonable request  
4  
5 addressed to the corresponding author.  
6  
7  
8  
9  
10  
11  
12  
13  
14  
15  
16  
17  
18  
19  
20  
21  
22  
23  
24  
25  
26  
27  
28  
29  
30  
31  
32  
33  
34  
35  
36  
37  
38  
39  
40  
41  
42  
43  
44  
45  
46  
47  
48  
49  
50  
51  
52  
53  
54  
55  
56  
57  
58  
59  
60

Confidential

## RESULTS

In total, 18,892 prescriptions for 36,807 doses of thiamine were provided to 10,939 patients across the study period. Changes to the computerized order entry system promoting prescribing of parenteral thiamine for patients at risk of thiamine deficiency were associated with a dramatic shift in prescribing practices. Prescriptions for parenteral thiamine rose from 55.5% (3386/6105) to 92.5% (11,829/12,787;  $\chi^2=3617.7$ ;  $p<0.001$ ) following the intervention, while the proportion of parenteral doses prescribed increased from 44.2% (7052/15,947) to 92.8% (19,357/20,860;  $\chi^2=10,520.1$ ;  $p<0.001$ ). Improvements in parenteral prescribing were matched by increases in the average number of prescriptions issued per year (rising from 3053 to 3719 per year post-intervention—a 21.8% increase), and numbers of patients treated (rising from 1454 to 2336 per year post-intervention—a 60.7% increase). The average number of doses prescribed decreased by 23.9% following the intervention, declining from 7974 to 6066 per year post-intervention.

Changes in prescribing behavior were sustained or increased across the 3.4 year post-intervention observation period (Figure 2). The number of total prescriptions for thiamine and doses prescribed remained stable month-to-month following the intervention, while the number of patients prescribed thiamine gradually increased. Sustained increases in parenteral prescribing were observed following changes to the computerized order entry system, with the total prescriptions, number of patients treated, and total prescribed doses of parenteral thiamine continuing to increase with time from intervention (Table 1).

The proportion of annualized prescriptions for parenteral thiamine across services increased, on average ( $\pm$  SD), by 179.0% (59.6%; range: 128.0-298.2%). Prescribers from all but one service, achieved parenteral prescribing rates  $>80\%$  following the intervention (average= $91.4\pm 6.8\%$ ; range: 77.9-98.9%). Psychiatry providers demonstrated greater-than-

1  
2  
3 average increases in rates of parenteral prescribing, with the proportion of parenteral  
4  
5 prescriptions increasing from 26.1% to 77.9% post-intervention ( $z=2.0$ ;  $p=0.045$ ), although  
6  
7 annualized rates of parenteral prescribing were lower than observed with other services ( $z=-1.98$ ;  
8  
9  $p=0.048$ ). Similar relationships were observed when the annualized number of doses prescribed  
10  
11 were considered. When only first prescriptions were considered, all services achieved parenteral  
12  
13 prescribing rates  $>80\%$  (Table 2). Increases in the proportion of parenteral prescribing were  
14  
15 matched by increases in the total numbers of prescriptions issued by ED and ICU providers. The  
16  
17 opposite relationship was observed with providers affiliated with other services, where  
18  
19 proportional increases in parenteral prescribing were driven by disproportionate decreases in  
20  
21 prescriptions for oral thiamine.  
22  
23  
24  
25

26 Changes to the computerized order entry system promoting use of higher doses of  
27  
28 parenteral thiamine were also associated with changes in the dosages prescribed and schedule.  
29  
30 Pre-intervention, prescribers exhibited a near-universal approach to thiamine dosage, with 91.6%  
31  
32 (5592/6105) of prescriptions issued for 100 mg of thiamine. Following the intervention,  
33  
34 prescriptions for 100 mg of thiamine decreased to 34.9% (4457/12,785;  $\chi^2=5342.07$ ;  $p<0.0001$ ).  
35  
36 Conversely, prescriptions for higher dosages of thiamine ( $\geq 200$  mg) increased from 1.1%  
37  
38 (65/6105) to 61.4% (7845/12,787;  $\chi^2=6170.5$ ;  $p<0.0001$ ; Figure 3A). Although the vast majority  
39  
40 of thiamine continued to be prescribed one-time or once daily (before: 99.3%, 6060/6100; after:  
41  
42 93.8%, 11,994/12,785;  $\chi^2=300.3$ ;  $p<0.0001$ ), prescriptions for thiamine three times daily (or  
43  
44 more frequently) increased from 0.5% (33/6100) to 6.1% (774/12,785;  $\chi^2=306.8$ ;  $p<0.0001$ ;  
45  
46  
47  
48  
49 Figure 3B).  
50  
51  
52  
53  
54  
55  
56  
57  
58  
59  
60

**INTERPRETATION**

Acute thiamine deficiency is commonly encountered in inpatient settings where it contributes to substantial morbidity—including Wernicke encephalopathy and Koraskoff syndrome—and mortality if untreated or undertreated.<sup>16-19</sup> Despite wide dissemination of recommendations emphasizing the need to prescribe higher doses ( $\geq 200$  mg) of parenteral thiamine to rapidly reverse brain-thiamine deficiency,<sup>6-9</sup> a recent review of prescribing practices within Canadian academic hospitals established that the majority of thiamine was prescribed via the oral route at dosages of 100 mg.<sup>1</sup> The introduction of changes to the computerized order entry system promoting prescribing of higher dosages of parenteral thiamine to at-risk patients at our tertiary care hospital resulted in an abrupt improvement in rates of parenteral prescribing (the primary outcome), and the number of patients prescribed thiamine per year. Interestingly, these gains were accompanied by a decrease in the annualized number of doses of thiamine prescribed, suggesting that clinicians opted for shorter courses of parenteral thiamine, consistent with recommendations for the treatment of thiamine deficiency.<sup>6-9</sup> Most encouraging, these changes were sustained or amplified across the 3.4 year observation period and were realized across all prescribing services. Improvements were also noted in the proportion of prescriptions for higher dosages ( $\geq 200$  mg) of thiamine (secondary outcome), and to a lesser degree, frequency of administration. Analyses of effects on hospital services demonstrated greatest effect on front-line services, including ED and ICU, with these services experiencing substantial improvements in the rates of parenteral prescribing and the numbers of overall prescriptions and patients treated. These changes may have pre-empted subsequent prescribing by receiving services, accounting for post-intervention decreases in total numbers of thiamine prescriptions issued by providers affiliated with general and subspecialty medical, neurology, psychiatry and surgical services.

1  
2  
3 Robust changes in prescriber behavior observed following changes to the computerized  
4 order entry system far exceeded the modest benefits attributed to hospital-wide protocols  
5 promoting the use of parenteral thiamine in at-risk patients.<sup>10,13-15</sup> The observed response also  
6 exceeded benefits associated with the use of a clinical decision support tool promoting high-dose  
7 parenteral thiamine prescribing to patients with suspected alcohol use disorder admitted to an  
8 urban New York hospital. The tool, which autopopulated thiamine order sets in appropriate  
9 patients, led to an increase in the number of patients receiving appropriate treatment from 2.7%  
10 (3/113) to 20.2% (19/94).<sup>20</sup> Better-than-expected responses in our study may reflect key  
11 differences in design and implementation of the intervention. By codifying recommendations as  
12 the default selection within computerized order entry systems, our intervention made it easy for  
13 prescribers to “do the right thing”, and more difficult to deviate from recommended thiamine  
14 prescribing strategies. By not tying recommendations to specific clinical diagnoses (i.e., those  
15 meeting criteria for alcohol use disorder), we also simplified the prescribing process, removing  
16 the need for clinicians to identify eligible patients. This strategy was justified by the high  
17 potential for misdiagnoses or under-recognition of hospitalized patients at risk of thiamine  
18 deficiency (particularly those without a history of alcohol use disorder),<sup>8,13,21,22</sup> the importance of  
19 rapid replacement of thiamine in acutely deficient patients,<sup>6,23</sup> and the low risk of side effects  
20 associated with parenteral administration.<sup>24,25</sup> We acknowledge that such a simplified approach  
21 may not be appropriate in other clinical scenarios—particularly those where the recommended  
22 treatment may be associated with specific risks or high costs.

23  
24 We leveraged an existing computerized order entry system to efficiently and cost-  
25 effectively implement our intervention. This strategy offered compelling advantages over more  
26 traditional approaches that rely on labor-intensive pharmacy-based interventions and manual  
27  
28  
29  
30  
31  
32  
33  
34  
35  
36  
37  
38  
39  
40  
41  
42  
43  
44  
45  
46  
47  
48  
49  
50  
51  
52  
53  
54  
55  
56  
57  
58  
59  
60

1  
2  
3 chart review,<sup>12</sup> or educational initiatives, which need to be revised and repeated to keep up with  
4  
5 staff turn-over and changes in clinical rotations that are especially common in academic  
6  
7 hospitals.<sup>26</sup> As electronic medical records become increasingly ubiquitous in healthcare, it may  
8  
9 be possible to extend this approach to address diagnostic and therapeutic shortcomings in other  
10  
11 areas of medicine that are supported by well-accepted practice parameters or guidelines (e.g.,  
12  
13 infection risk reduction in intensive care units,<sup>27</sup> management of acute exacerbations in patients  
14  
15 with chronic obstructive pulmonary disease exacerbations<sup>28</sup>). With this in mind, it will be  
16  
17 increasingly important to decipher the factors that influence response to interventions designed to  
18  
19 modify prescriber behavior, including the degree of consensus concerning the recommended  
20  
21 treatment approach, potential for benefit versus adverse effects associated with the intervention,  
22  
23 and perceived costs and barriers associated with prescribing and administration. It is likely that  
24  
25 some of these factors contributed to the lower-than-expected rates of parenteral prescribing  
26  
27 amongst psychiatric prescribers at our hospital, recognizing that difficulties with parenteral  
28  
29 administration may be unique to this patient population (attributed to difficulties maintaining  
30  
31 parenteral access in agitated patients). It is particularly important to explore alternate or  
32  
33 additional approaches to optimize prescribing by psychiatric providers, acknowledging that acute  
34  
35 thiamine deficiency may cause or exacerbate presenting symptoms,<sup>19</sup> and that patients with  
36  
37 psychiatric illnesses may be at particularly high risk of thiamine deficiency due to malnutrition  
38  
39 associated with eating disorders, substance abuse or somatoform disorders,<sup>29-31</sup> and higher rates  
40  
41 of comorbid physical illnesses.<sup>32</sup> Similar efforts are needed to understand the factors that  
42  
43 underlie the strong preference for one-time or once daily dosing of thiamine noted within our  
44  
45 hospital network and others.<sup>1,11</sup> While most studies to date have considered the impact of one  
46  
47 intervention on prescribing practices, future studies are needed to assess the effect of  
48  
49  
50  
51  
52  
53  
54  
55  
56  
57  
58  
59  
60



1  
2  
3 multifaceted approaches integrating changes to computerized order entry systems together with  
4  
5 educational approaches targeting specific services and prescribing patterns.  
6

7  
8 Interpretation of our results are subject to limitations. As anonymized data were obtained  
9  
10 from computerized pharmacy information systems, it was only possible to determine how much  
11  
12 thiamine was prescribed, not what was actually delivered to patients. Similarly, we were unable  
13  
14 to consider the specific indications for prescribing—precluding subanalyses of prescribing  
15  
16 behavior in patients with suspected Wernicke encephalopathy—or whether our intervention led  
17  
18 to measurable improvement in patient outcomes. Additionally, as this study was completed  
19  
20 within a single hospital network, our findings need to be replicated within other hospital  
21  
22 environments, including non-academic centers, to establish generalizability and to better  
23  
24 understand how center-specific factors influence compliance with existing recommendations and  
25  
26 response to changes to the computerized order entry system. These limitations notwithstanding,  
27  
28 our results demonstrate that changes to computerized order entry systems led to dramatic  
29  
30 changes in thiamine prescribing behaviors within our hospital network. These changes were  
31  
32 sustained across the observation period and realized across all prescribing services. If validated  
33  
34 in other populations, practice areas and hospitals, changes to computerized order entry systems  
35  
36 may be leveraged to efficiently and cost-effectively modify prescriber behavior, improving  
37  
38 compliance with clinical recommendations and patient care.  
39  
40  
41  
42  
43  
44  
45  
46  
47  
48  
49  
50  
51  
52  
53  
54  
55  
56  
57  
58  
59  
60

## REFERENCES

1. Day GS, Ladak S, Curley K, et al. Thiamine prescribing practices within university-affiliated hospitals: a multicenter retrospective review. *Journal of hospital medicine : an official publication of the Society of Hospital Medicine*. 2015;10:246-53.
2. Correia MITD, Waitzberg DL. The impact of malnutrition on morbidity, mortality, length of hospital stay and costs evaluated through a multivariate model analysis. *Clinical Nutrition*. 2003;22:235-9.
3. Edington J, Boorman J, Durrant ER, et al. Prevalence of malnutrition on admission to four hospitals in England. The Malnutrition Prevalence Group. *Clin Nutr*. 2000;19:191-5.
4. Kirkland LL, Kashiwagi DT, Brantley S, Scheurer D, Varkey P. Nutrition in the hospitalized patient. *Journal of hospital medicine : an official publication of the Society of Hospital Medicine*. 2013;8:52-8.
5. van Snippenburg W, Reijnders MGJ, Hofhuis JGM, de Vos R, Kamphuis S, Spronk PE. Thiamine Levels During Intensive Insulin Therapy in Critically Ill Patients. *J Intensive Care Med*. 2017;32:559-64.
6. Day GS, del Campo CM. Five things to know about Wernicke's Encephalopathy: A Medical Emergency. *CMAJ*. 2013;1.
7. Thomson AD, Cook CC, Touquet R, Henry JA, Royal College of Physicians L. The Royal College of Physicians report on alcohol: guidelines for managing Wernicke's encephalopathy in the accident and Emergency Department. *Alcohol and alcoholism*. 2002;37:513-21.

- 1  
2  
3 8. Galvin R, Brathen G, Ivashynka A, et al. EFNS guidelines for diagnosis, therapy and  
4 prevention of Wernicke encephalopathy. *European journal of neurology : the official*  
5  
6 *journal of the European Federation of Neurological Societies*. 2010;17:1408-18.  
7  
8
- 9  
10 9. NICE. Alcohol-use disorders: Diagnosis and clinical management of alcohol-related  
11  
12 physical complications. 2010.  
13
- 14  
15 10. Isenberg-Grzeda E, Chabon B, Nicolson SE. Prescribing thiamine to inpatients with  
16  
17 alcohol use disorders: how well are we doing? *Journal of addiction medicine*. 2014;8:1-5.  
18
- 19  
20 11. Alim U, Bates D, Langevin A, et al. Thiamine Prescribing Practices for Adult Patients  
21  
22 Admitted to an Internal Medicine Service. *Can J Hosp Pharm*. 2017;70:179-87.  
23
- 24  
25 12. Day E, Callaghan R, Kuruvilla T, George S, Webb K, Bentham P. Pharmacy-based  
26  
27 intervention in Wernicke's encephalopathy. *The Psychiatrist*. 2018;34:234-8.  
28
- 29  
30 13. Isenberg-Grzeda E, Kutner HE, Nicolson SE. Wernicke-Korsakoff-syndrome: under-  
31  
32 recognized and under-treated. *Psychosomatics*. 2012;53:507-16.  
33
- 34  
35 14. Thomson AD, Marshall EJ, Bell D. Time to act on the inadequate management of  
36  
37 Wernicke's encephalopathy in the UK. *Alcohol and alcoholism*. 2013;48:4-8.  
38
- 39  
40 15. Quinn S, Samuel R, Bolton J, Iankov B, Stout A. Pharmacological management of  
41  
42 alcohol withdrawal in a general hospital. *Psychiatric Bulletin*. 2018;32:452-4.  
43
- 44  
45 16. Cravioto H, Korein J, Silberman J. Wernicke's encephalopathy. A clinical and  
46  
47 pathological study of 28 autopsied cases. *Arch Neurol*. 1961;4:510-9.  
48
- 49  
50 17. Harper C. The incidence of Wernicke's encephalopathy in Australia--a neuropathological  
51  
52 study of 131 cases. *J Neurol Neurosurg Psychiatry*. 1983;46:593-8.  
53
- 54  
55 18. Harper C. Wernicke's encephalopathy: a more common disease than realised. A  
56  
57 neuropathological study of 51 cases. *J Neurol Neurosurg Psychiatry*. 1979;42:226-31.  
58  
59  
60

- 1  
2  
3 19. Harper CG, Giles M, Finlay-Jones R. Clinical signs in the Wernicke-Korsakoff complex:  
4 a retrospective analysis of 131 cases diagnosed at necropsy. *J Neurol Neurosurg*  
5 *Psychiatry*. 1986;49:341-5.  
6  
7
- 8  
9  
10 20. Wai JM, Aloeos C, Mowrey WB, Baron SW, Cregin R, Forman HL. Using clinical  
11 decision support through the electronic medical record to increase prescribing of high-  
12 dose parenteral thiamine in hospitalized patients with alcohol use disorder. *J Subst Abuse*  
13 *Treat*. 2019;99:117-23.  
14  
15
- 16  
17  
18 21. Ramayya A, Jauhar P. Increasing incidence of Korsakoff's psychosis in the east end of  
19 Glasgow. *Alcohol and alcoholism*. 1997;32:281-5.  
20  
21
- 22  
23 22. Ferguson RK, Soryal IN, Pentland B. Thiamine deficiency in head injury: a missed  
24 insult? *Alcohol and alcoholism*. 1997;32:493-500.  
25  
26
- 27  
28 23. Victor M, Adams RD, Collins GH. The Wernicke-Korsakoff syndrome. A clinical and  
29 pathological study of 245 patients, 82 with post-mortem examinations. *Contemp Neurol*  
30 *Ser*. 1971;7:1-206.  
31  
32
- 33  
34 24. Wrenn KD, Murphy F, Slovis CM. A toxicity study of parenteral thiamine hydrochloride.  
35 *Annals of emergency medicine*. 1989;18:867-70.  
36  
37
- 38  
39 25. Wrenn KD, Slovis CM. Is intravenous thiamine safe? *The American Journal of*  
40 *Emergency Medicine*. 1992;10:165.  
41  
42
- 43  
44 26. Warren DK, Zack JE, Mayfield JL, et al. The effect of an education program on the  
45 incidence of central venous catheter-associated bloodstream infection in a medical ICU.  
46 *Chest*. 2004;126:1612-8.  
47  
48  
49  
50  
51  
52  
53  
54  
55  
56  
57

- 1  
2  
3  
4  
5  
6  
7  
8  
9  
10  
11  
12  
13  
14  
15  
16  
17  
18  
19  
20  
21  
22  
23  
24  
25  
26  
27  
28  
29  
30  
31  
32  
33  
34  
35  
36  
37  
38  
39  
40  
41  
42  
43  
44  
45  
46  
47  
48  
49  
50  
51  
52  
53  
54  
55  
56  
57  
58  
59  
60
27. Miller RS, Norris PR, Jenkins JM, et al. Systems initiatives reduce healthcare-associated infections: a study of 22,928 device days in a single trauma unit. *J Trauma*. 2010;68:23-31.
  28. Kitchlu A, Abdelshaheed T, Tullis E, Gupta S. Gaps in the inpatient management of chronic obstructive pulmonary disease exacerbation and impact of an evidence-based order set. *Can Respir J*. 2015;22:157-62.
  29. Cook CC, Hallwood PM, Thomson AD. B Vitamin deficiency and neuropsychiatric syndromes in alcohol misuse. *Alcohol and alcoholism*. 1998;33:317-36.
  30. Winston AP, Jamieson CP, Madira W, Gatward NM, Palmer RL. Prevalence of thiamin deficiency in anorexia nervosa. *Int J Eat Disord*. 2000;28:451-4.
  31. McCormick LM, Buchanan JR, Onwuameze OE, Pierson RK, Paradiso S. Beyond alcoholism: Wernicke-Korsakoff syndrome in patients with psychiatric disorders. *Cogn Behav Neurol*. 2011;24:209-16.
  32. Matheson FI, Smith KLW, Moineddin R, Dunn JR, Glazier RH. Mental health status and gender as risk factors for onset of physical illness over 10 years. *J Epidemiol Community Health*. 2013.

## Figure Legends

Figure 1: Timeline of review and implementation of changes to the computerized order entry system.

Figure 2: Longitudinal changes in prescribing behavior. Changes in total thiamine prescriptions (A), first prescriptions for thiamine (B) and doses of thiamine prescribed (C) are shown before (January 1, 2010 to December 13, 2011) and after (November 21, 2013 to April 30, 2017) the intervention (dashed line). The red trend line corresponds to the percentage of prescriptions for parenteral thiamine at each timepoint.

Figure 3: Changes in dose and frequency of thiamine prescribed. Dosage (in milligrams; A) and frequency of administration (B) of thiamine prescribed before and after the intervention.

\*\*= $p < 0.001$  QD = once daily; BID = twice daily; TID = three times daily

Table 1: Longitudinal changes in thiamine prescribing following changes to the computerized order entry system.

| <b>Prescribing behavior</b>                               | <b>Beta</b> | <b>95% CI</b> | <b>p value</b> |
|-----------------------------------------------------------|-------------|---------------|----------------|
| <b>All prescriptions (parenteral and oral), per month</b> |             |               |                |
| Total prescriptions provided                              | 0.51        | -0.22, 1.24   | 0.16           |
| Number of patients prescribed                             | 0.83        | 0.34, 1.31    | 0.001          |
| Total doses prescribed                                    | 1.21        | -0.28, 2.71   | 0.11           |
| <b>Proportion of parenteral prescriptions, per month</b>  |             |               |                |
| Prescriptions provided                                    | 0.11        | 0.06, 0.17    | <0.001         |
| Number of patients prescribed                             | 0.13        | 0.06, 0.21    | 0.001          |
| Doses prescribed                                          | 0.08        | 0.005, 0.15   | 0.038          |

$\beta \pm 95\%$  CI describing magnitude of association between prescribing behavior and months-from-intervention, determined using univariate linear regression (41 observations).

Table 2: Annualized thiamine prescribing before and after changes to the computerized physician order entry system, stratified by service.

| Prescribing service                                          | Before   |               | After    |               | Percentage change |               | p value* |
|--------------------------------------------------------------|----------|---------------|----------|---------------|-------------------|---------------|----------|
|                                                              | Total, n | Parenteral, % | Total, n | Parenteral, % | Total, n          | Parenteral, % |          |
| <i>Annualized number of prescriptions for thiamine</i>       |          |               |          |               |                   |               |          |
| ED                                                           | 675      | 62.7          | 1592     | 87.9          | 235.8             | 140.2         | <0.0001  |
| ICU                                                          | 181      | 77.3          | 747      | 98.9          | 413.7             | 128.0         | <0.0001  |
| Medical Subspecialty                                         | 309      | 49.9          | 82       | 91.8          | -73.5             | 183.9         | <0.0001  |
| Medicine                                                     | 968      | 46.2          | 752      | 94.5          | -22.3             | 204.7         | <0.0001  |
| Neurology                                                    | 90       | 70.4          | 56       | 93.7          | -37.9             | 133.1         | 0.0063   |
| Psychiatry                                                   | 44       | 26.1          | 20       | 77.9          | -55.1             | 298.2         | 0.0009   |
| Surgery                                                      | 787      | 57.8          | 471      | 95.1          | -40.2             | 164.7         | <0.0001  |
| <i>Annualized number of first prescriptions for thiamine</i> |          |               |          |               |                   |               |          |
| ED                                                           | 320      | 64.5          | 1394     | 88.0          | 435.6             | 136.3         | <0.0001  |
| ICU                                                          | 97       | 72.5          | 369      | 99.1          | 382.1             | 136.7         | <0.0001  |
| Medical Subspecialty                                         | 145      | 47.2          | 40       | 90.4          | -72.7             | 191.4         | <0.0001  |
| Medicine                                                     | 505      | 45.6          | 251      | 95.0          | -50.3             | 208.4         | <0.0001  |
| Neurology                                                    | 44       | 77.3          | 21       | 97.2          | -53.1             | 125.8         | 0.0203   |
| Psychiatry                                                   | 20       | 25.0          | 11       | 84.6          | -43.3             | 338.5         | 0.0004   |
| Surgery                                                      | 324      | 57.5          | 251      | 96.4          | -22.5             | 167.7         | <0.0001  |
| <i>Annualized number of doses of thiamine prescribed</i>     |          |               |          |               |                   |               |          |
| ED                                                           | 1386     | 31.1          | 1683     | 88.5          | 121.5             | 284.5         | <0.0001  |
| ICU                                                          | 482      | 70.1          | 1340     | 97.9          | 278.0             | 139.5         | <0.0001  |
| Medical Subspecialty                                         | 969      | 40.6          | 189      | 93.2          | -80.5             | 229.6         | <0.0001  |
| Medicine                                                     | 2457     | 43.3          | 1810     | 93.0          | -26.3             | 214.6         | <0.0001  |
| Neurology                                                    | 248      | 67.1          | 129      | 94.1          | -48.1             | 140.2         | <0.0001  |
| Psychiatry                                                   | 167      | 15.9          | 44       | 71.9          | -73.3             | 451.7         | <0.0001  |
| Surgery                                                      | 2266     | 48.8          | 870      | 93.8          | -61.6             | 192.0         | <0.0001  |

\*p-value reflects changes in rates of parenteral prescribing following the intervention (chi-square, df=1)

ED=Emergency Department, ICU=Intensive Care Unit



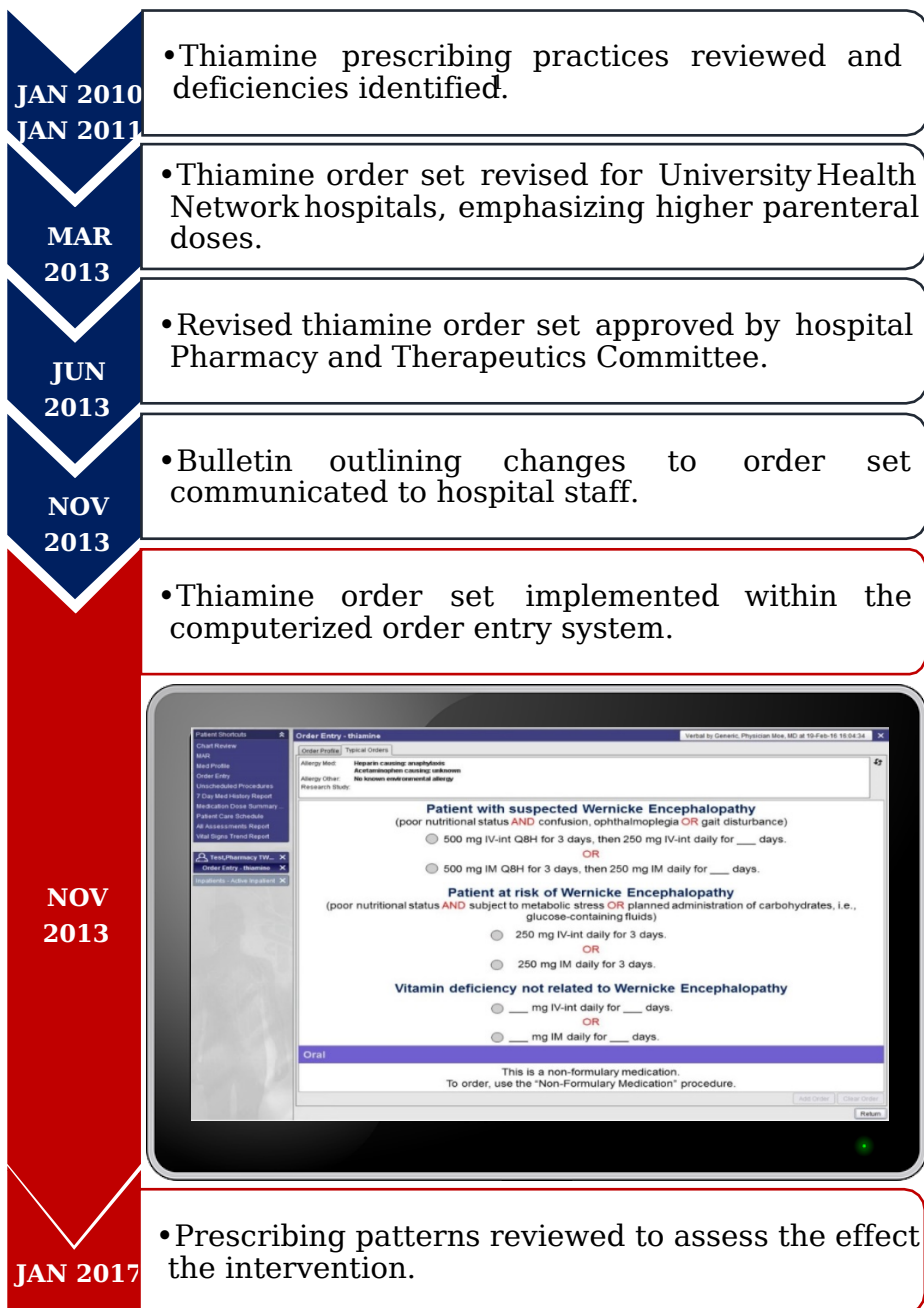

**A. Total thiamine prescriptions**

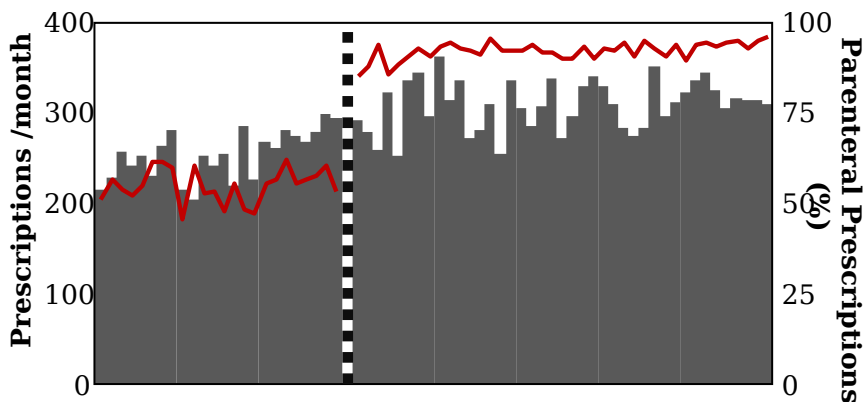

**B. First prescriptions for thiamine**

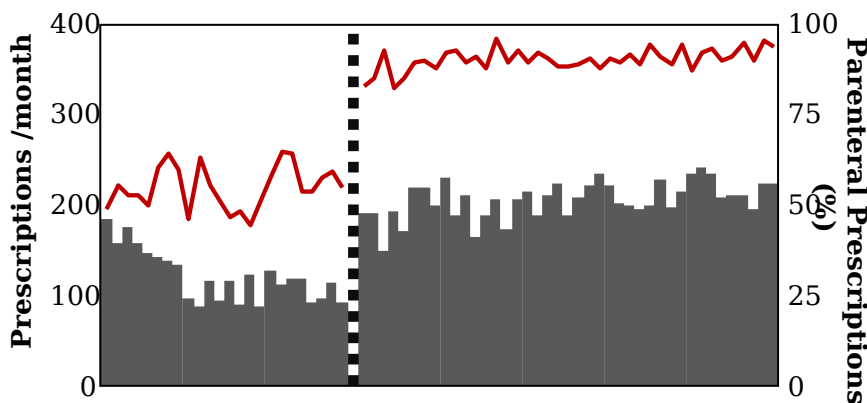

**C. Doses of thiamine prescribed**

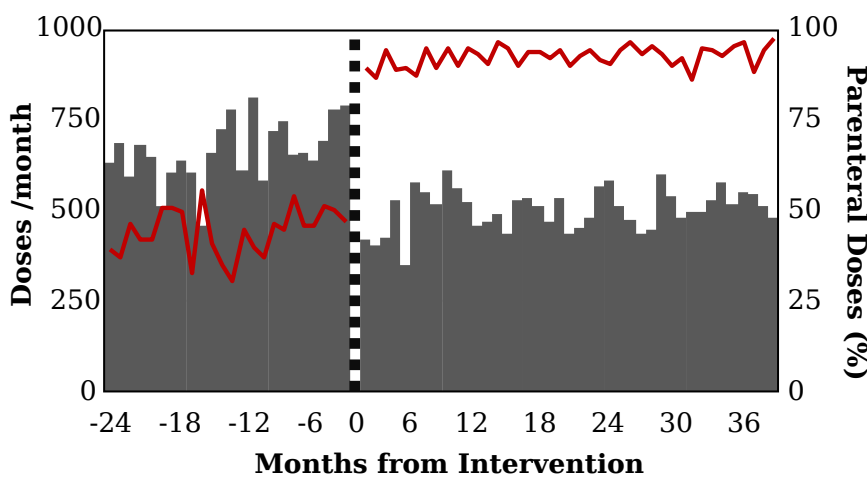

### A. Dose of thiamine prescribed

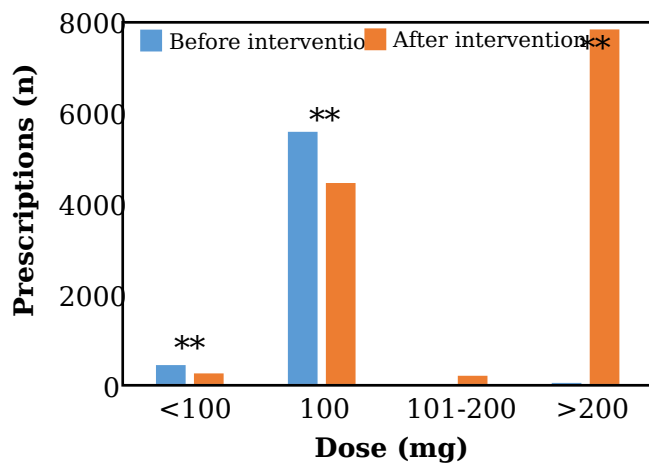

### B. Frequency of thiamine administration prescribed

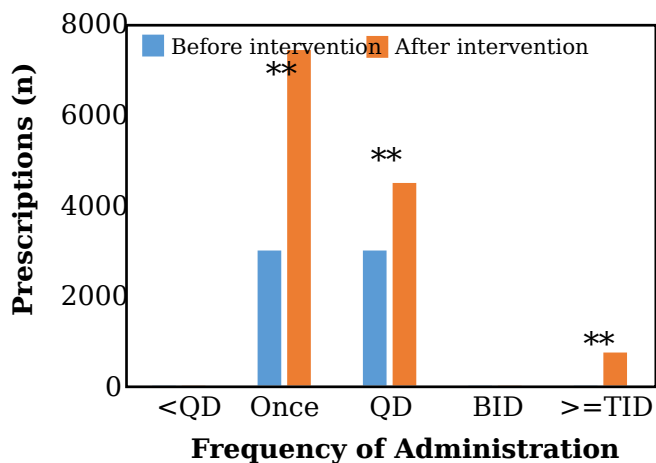

Supplement: 2020-0029-original-submission.pdf [file 2020-0029-original-submission.pdf]
